# Supplementary material for: Dentists’ perceptions and usability testing toward the implementation of the ISAC, a comprehensive oral cancer intervention in dental practices: a qualitative study in Jazan region, Saudi Arabia
Source: Springer Nature journal article supplement (doi:10.1186/s12913-022-07586-2), 2022-02-12
Supplement: MOESM2 [file 20127964]

**Coding Tree Map: Main themes and sub-themes identified from the qualitative analysis using NVivo software for the interview and focus group discussion.**

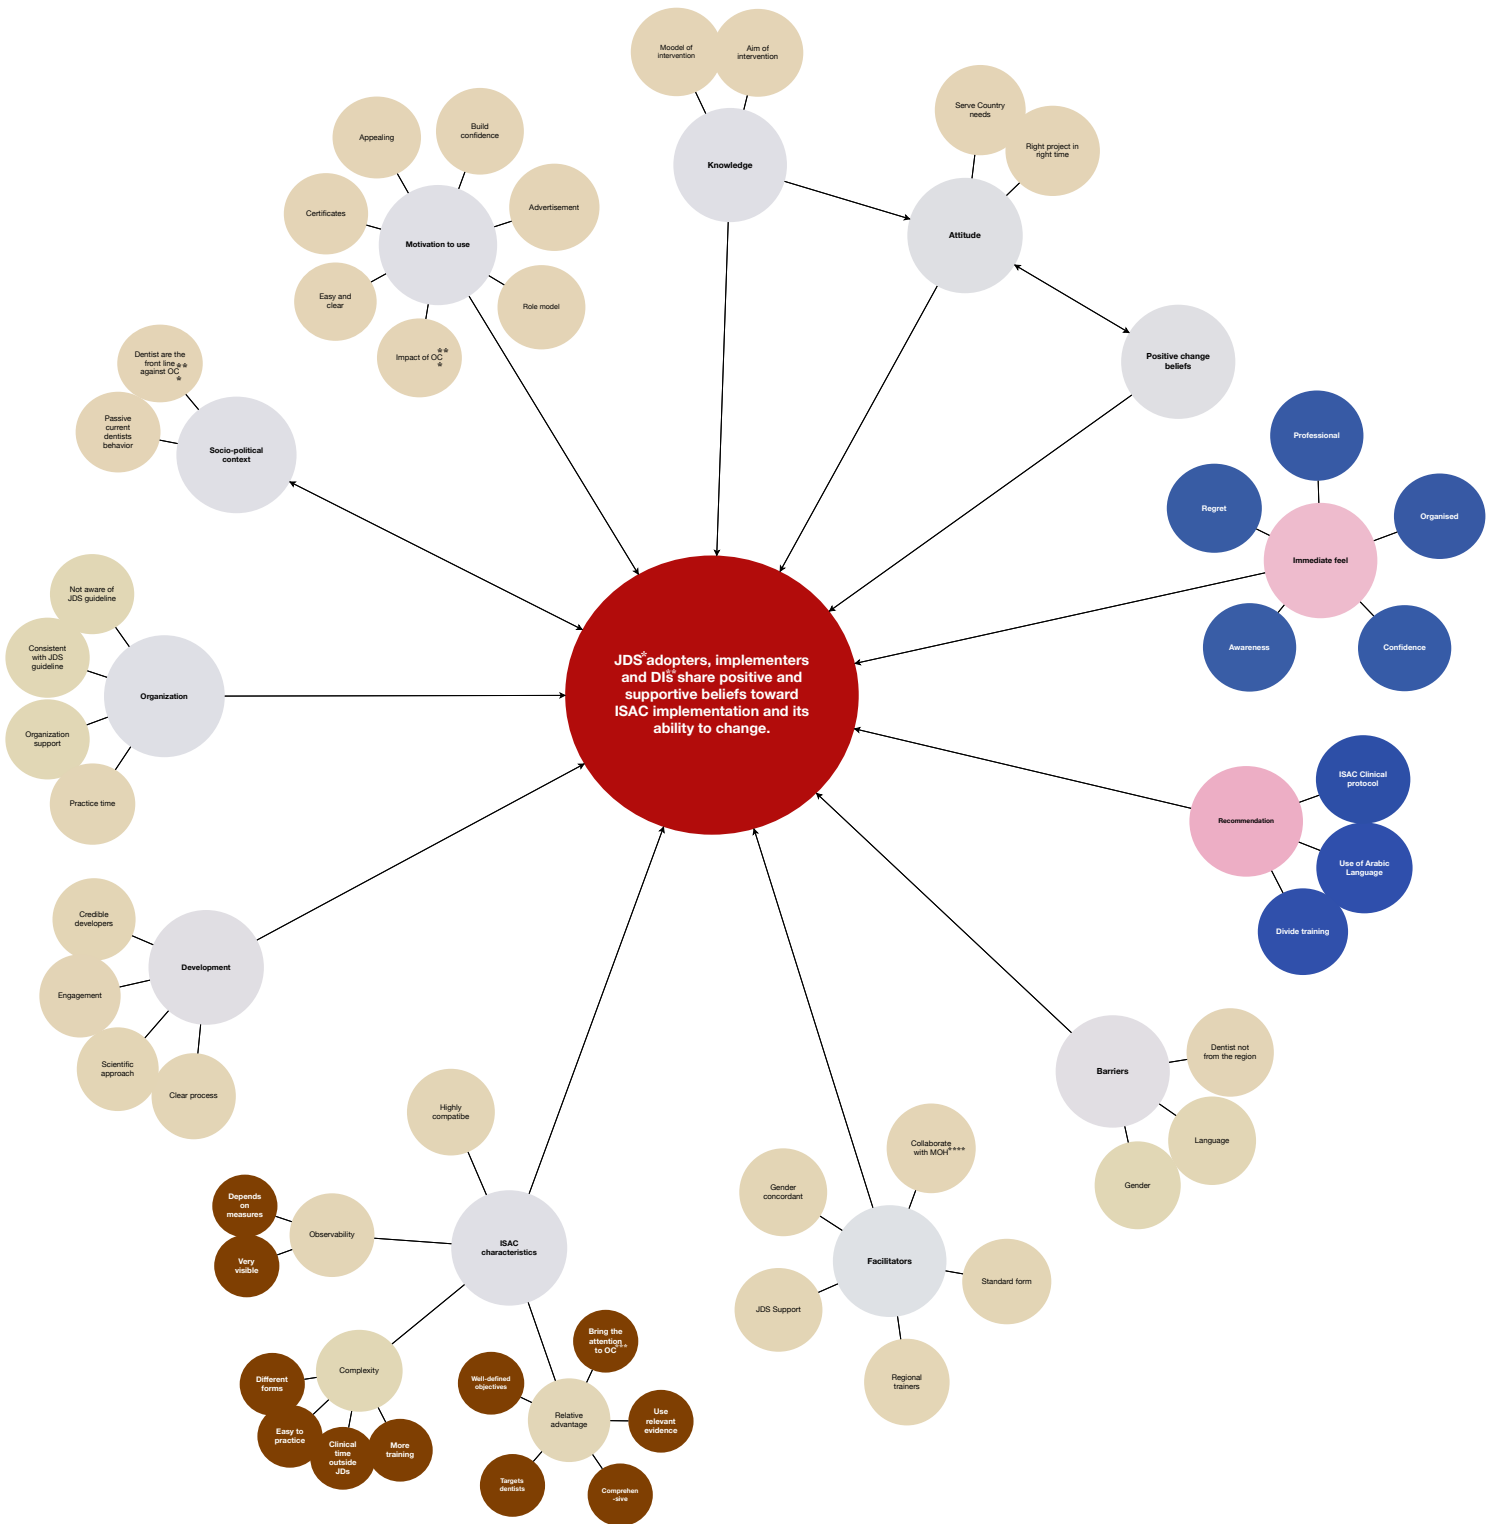

\*JDS: Jazan Dental School; \*\*DIs: Dental Interns; \*\*\*OC: Oral Cancer; \*\*\*\*MOH: Ministry of Health
